# Supplementary material
Source: PubMed Central journal article supplement (PMC4108196)
Supplement: NIHMS586312-supplement-Supplementary.pdf [file NIHMS586312-supplement-Supplementary.pdf]

Supplementary Materials for  
**Inositol Polyphosphate Multikinase Is a Coactivator of p53-Mediated  
Transcription and Cell Death**

Risheng Xu, Nilkantha Sen, Bindu D. Paul, Adele M. Snowman, Feng Rao,  
M. Scott Vandiver, Jing Xu, Solomon H. Snyder\*

\*Corresponding author. E-mail: [ssnyder@jhmi.edu](mailto:ssnyder@jhmi.edu)

Published 2 April 2013, *Sci. Signal.* **6**, ra22 (2013)  
DOI: 10.1126/scisignal.2003405

**The PDF file includes:**

- Fig. S1. IPMK regulates expression of p53 downstream targets.
- Fig. S2. IPMK is depleted with shRNA.
- Fig. S3. Protein abundance of p53 targets is decreased by IPMK depletion.
- Fig. S4. Abundance of p53 target proteins increased by IPMK is p53-dependent.
- Fig. S5. IPMK binds the PUMA promoter.
- Fig. S6. Genetic deletion of IPMK decreases p53 binding to its target promoters.
- Fig. S7. IPMK inhibits cell proliferation.

## Supplementary Figure 1

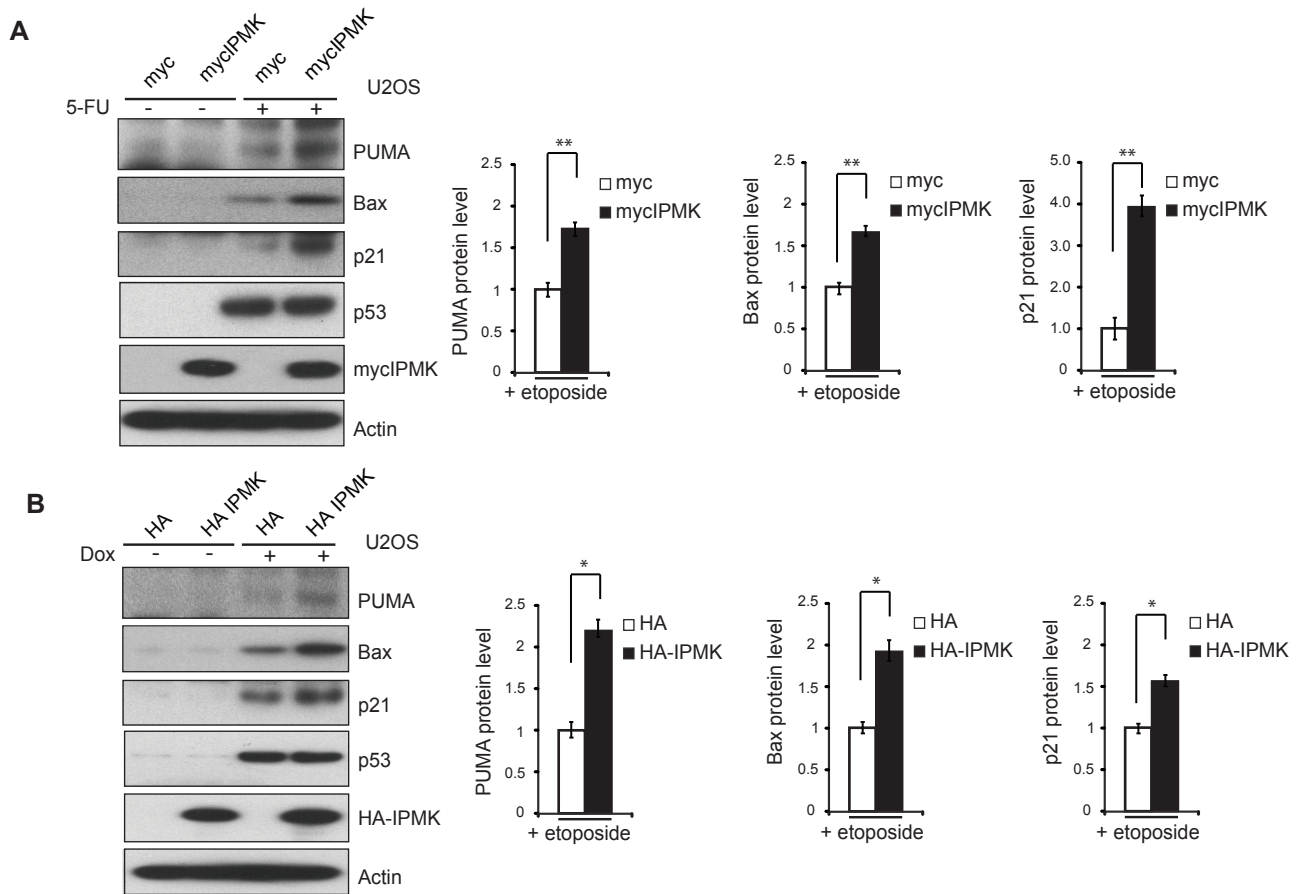

**Fig. S1. IPMK regulates expression of p53 downstream targets.** (A) Western blotting analysis and quantification of PUMA, Bax, and p21 protein abundance in U2OS cells transfected with plasmids encoding myc or mycIPMK and treated with 400  $\mu$ M 5-fluorouracil (5-FU). (B) Western blotting analysis and quantification of PUMA, Bax, and p21 protein abundance in U2OS cells transfected with plasmids encoding HA or HA-IPMK and treated with 1  $\mu$ M doxorubicin (Dox). Data are means  $\pm$  SEM of three experiments. \*P<0.05, Student's t-test.

Supplementary Figure 2

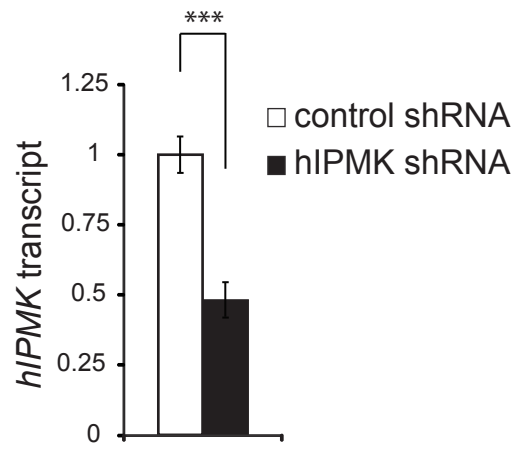

**Fig. S2. IPMK is depleted with shRNA.** qRT-PCR analysis of IPMK mRNA in HCT116 cells transfected with control or IPMK-specific shRNAs. Data are means  $\pm$  SEM of four experiments.

\*\*\*P<0.001, Student's t-test.

Supplementary Figure 3

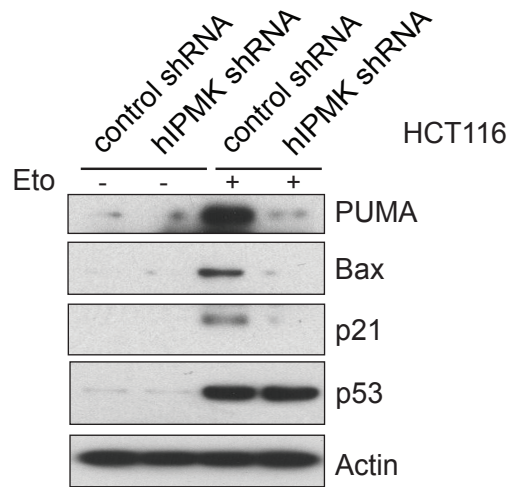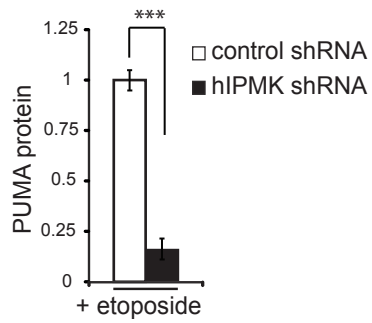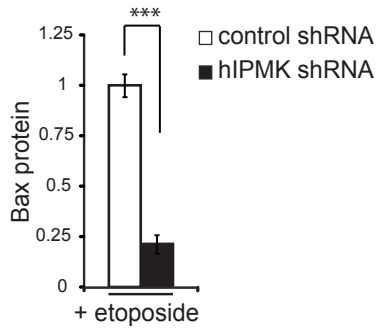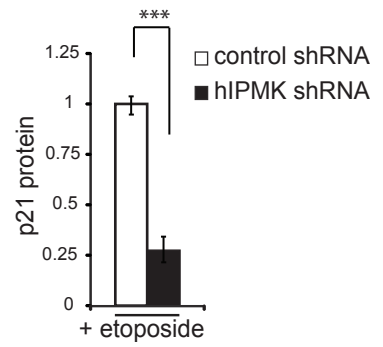

**Fig. S3. Protein abundance of p53 targets is decreased by IPMK depletion.** Western blotting analysis and quantification of PUMA, Bax, and p21 protein abundance in HCT116 cells transfected with control or IPMK-specific shRNA and treated with 10  $\mu$ M etoposide. Data are means  $\pm$  SEM of four experiments. \*\*\*P<0.001, Student's t-test.

Supplementary Figure 4

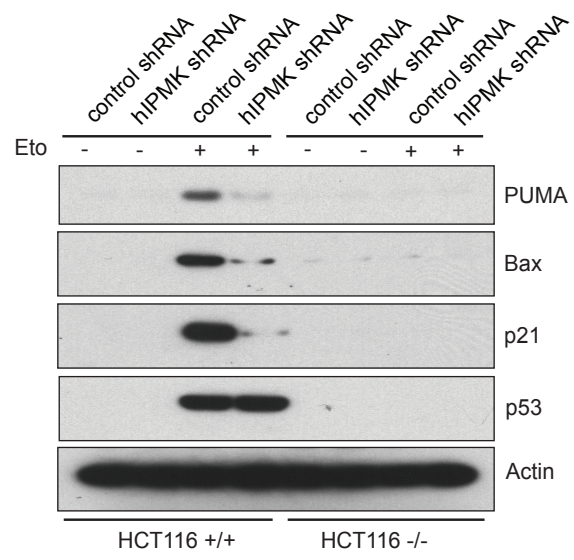



**Fig. S4. Abundance of p53 target proteins increased by IPMK is p53-dependent.** Western blotting analysis of PUMA, Bax, and p21 abundance in wild-type (+/+) and *p53*-null (-/-) HCT116 cells transfected with hIPMK-specific shRNA and treated with 10  $\mu$ M etoposide. Blots are representative of 3 experiments.

Supplementary Figure 5

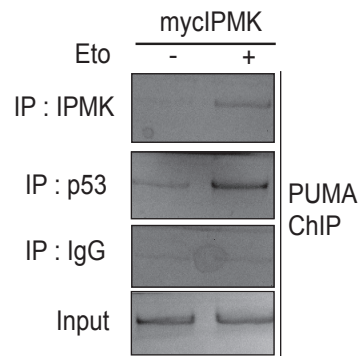

**Fig. S5. IPMK binds the PUMA promoter.** ChIP analysis of IPMK binding to the promoter of *PUMA* in U2OS cells transfected with plasmids encoding myc or mycIPMK and treated with 10  $\mu$ M etoposide. Blots are representative of 4 experiments.

Supplementary Figure 6

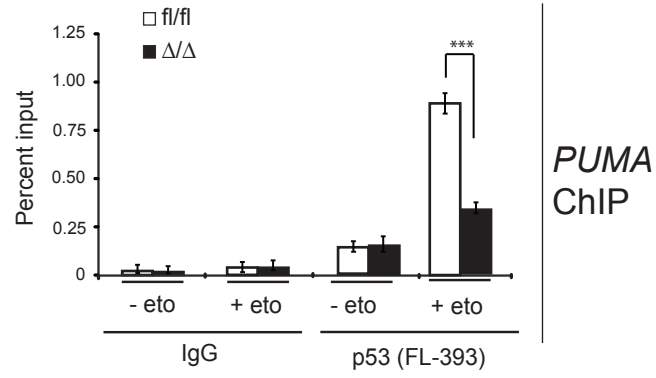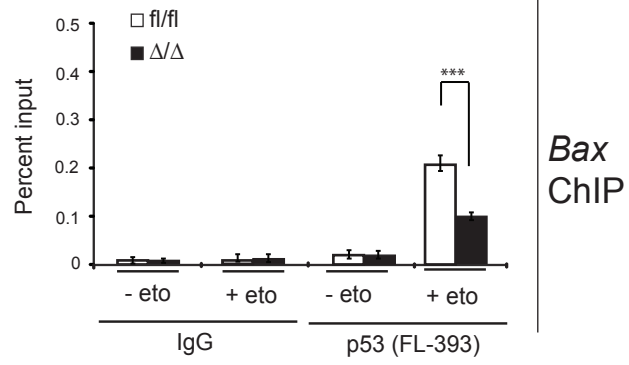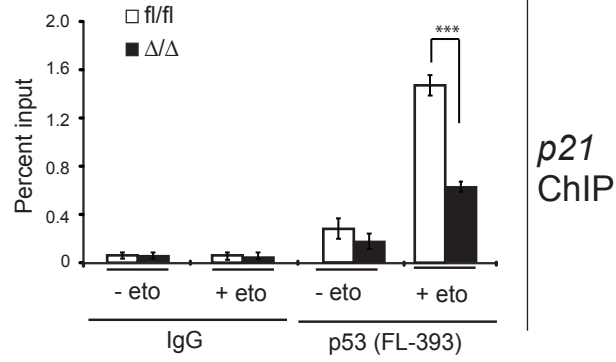

**Fig. S6. Genetic deletion of IPMK decreases p53 binding to its target promoters.** ChIP analysis of p53 binding to the promoters of *PUMA*, *Bax*, and *p21* in IPMK-deficient ( $\Delta/\Delta$ ) MEFs treated with 20  $\mu$ M etoposide. The FL-393 epitope antibody was used for p53. Data are means  $\pm$  SEM of three experiments. \*\*\* $P < 0.001$ , Student's t-test.

# Supplementary Figure 7

**A**

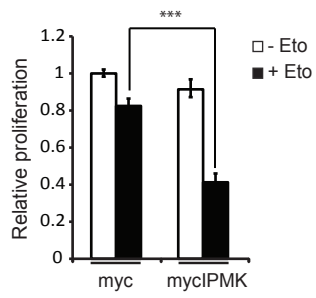

**B**

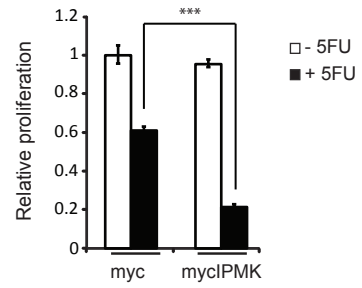

**C**

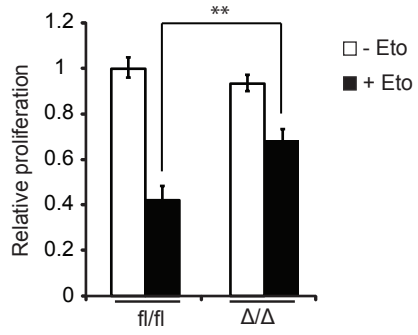

**Fig. S7. IPMK inhibits cell proliferation.** Proliferation of U2OS cells transfected with plasmid encoding myc or mycIPMK and treated with either 15  $\mu$ M etoposide (**A**) or 400  $\mu$ M 5-FU (**B**). \*\*\* $P < 0.001$ ,  $n = 4$ , mean  $\pm$  s.e.m., Student's t-test. (**C**) Proliferation of IPMK-deficient ( $\Delta/\Delta$ ) MEFs treated with 20  $\mu$ M etoposide was measured with the MTT assay. Data are means  $\pm$  SEM of three experiments. \*\* $P < 0.01$ , Student's t-test.
